# Supplementary material for: Network Analysis of Academic Medical Center Websites in the United States
Source: PubMed Central journal article supplement (PMC10147938; doi:10.1038/s41597-023-02104-3), 2023-04-28
Supplement: 41597_2023_2104_MOESM1_ESM.pdf [file 41597_2023_2104_MOESM1_ESM.pdf]

**Supplementary Table 1.** Excluded websites with associated reasons for exclusion.

| <b>Website</b>                                                                                                                | <b>Reason for exclusion</b>          |
|-------------------------------------------------------------------------------------------------------------------------------|--------------------------------------|
| <a href="https://www.utmedicalcenter.org/">https://www.utmedicalcenter.org/</a>                                               | Network security preventing crawling |
| <a href="https://www.ouhealth.com/">https://www.ouhealth.com/</a>                                                             | Network security preventing crawling |
| <a href="https://www.bonsecours.com/">https://www.bonsecours.com/</a>                                                         | Excessive domain size                |
| <a href="https://www.emoryhealthcare.org/index.html">https://www.emoryhealthcare.org/index.html</a>                           | Excessive domain size                |
| <a href="https://www.medstarhealth.org/">https://www.medstarhealth.org/</a>                                                   | Excessive domain size                |
| <a href="https://lluh.org/">https://lluh.org/</a>                                                                             | Excessive domain size                |
| <a href="https://www.umcno.org/">https://www.umcno.org/</a>                                                                   | Excessive domain size                |
| <a href="https://www.froedtert.com/">https://www.froedtert.com/</a>                                                           | Excessive domain size                |
| <a href="https://muschealth.org/">https://muschealth.org/</a>                                                                 | Excessive domain size                |
| <a href="https://www.ohsu.edu/health">https://www.ohsu.edu/health</a>                                                         | Excessive domain size                |
| <a href="https://stanfordhealthcare.org/">https://stanfordhealthcare.org/</a>                                                 | Excessive domain size                |
| <a href="https://www.upstate.edu/healthcare/">https://www.upstate.edu/healthcare/</a>                                         | Excessive domain size                |
| <a href="https://wexnermedical.osu.edu/">https://wexnermedical.osu.edu/</a>                                                   | Excessive domain size                |
| <a href="https://www.pennstatehealth.org/">https://www.pennstatehealth.org/</a>                                               | Excessive domain size                |
| <a href="https://www.bannerhealth.com/">https://www.bannerhealth.com/</a>                                                     | Excessive domain size                |
| <a href="https://www.uncmedicalcenter.org/uncmc/">https://www.uncmedicalcenter.org/uncmc/</a>                                 | Excessive domain size                |
| <a href="https://www.utmedicalcenter.org/">https://www.utmedicalcenter.org/</a>                                               | Excessive domain size                |
| <a href="https://www.universityhealthsystem.com/">https://www.universityhealthsystem.com/</a>                                 | Excessive domain size                |
| <a href="https://walterreed.tricare.mil/">https://walterreed.tricare.mil/</a>                                                 | Excessive domain size                |
| <a href="https://uamshealth.com/">https://uamshealth.com/</a>                                                                 | Excessive domain size                |
| <a href="https://www.ucihealth.org/">https://www.ucihealth.org/</a>                                                           | Excessive domain size                |
| <a href="https://www.ucsfhealth.org/">https://www.ucsfhealth.org/</a>                                                         | Excessive domain size                |
| <a href="https://www.uchealth.com/">https://www.uchealth.com/</a>                                                             | Excessive domain size                |
| <a href="https://hospital.uillinois.edu/">https://hospital.uillinois.edu/</a>                                                 | Excessive domain size                |
| <a href="https://www.kansashealthsystem.com/">https://www.kansashealthsystem.com/</a>                                         | Excessive domain size                |
| <a href="https://umiamihealth.org/">https://umiamihealth.org/</a>                                                             | Excessive domain size                |
| <a href="https://www.ouhealth.com/">https://www.ouhealth.com/</a>                                                             | Excessive domain size                |
| <a href="https://www.penncmedicine.org/for-patients-and-visitors">https://www.penncmedicine.org/for-patients-and-visitors</a> | Excessive domain size                |
| <a href="https://www.upmc.com/">https://www.upmc.com/</a>                                                                     | Excessive domain size                |

<https://www.urmc.rochester.edu/strong-memorial.aspx>

Excessive domain size

<https://uvahealth.com/>

Excessive domain size

<https://www.uwmedicine.org/>

Excessive domain size

<https://www.wakehealth.edu/>

Excessive domain size

<https://www.barnesjewish.org/>

Excessive domain size

**Supplementary Table 2.** Most influential AMCs ranked by importance index.

| <b>Rank</b> | <b>Importance Index</b> | <b>Name</b>                                                   |
|-------------|-------------------------|---------------------------------------------------------------|
| 1           | 0.495                   | University of Utah Health Sciences Center                     |
| 2           | 0.462                   | Augusta University                                            |
| 3           | 0.455                   | University of Miami                                           |
| 4           | 0.454                   | Midwestern University                                         |
| 5           | 0.45                    | Tulane University Health Sciences Center                      |
| 6           | 0.413                   | Marshall University                                           |
| 7           | 0.401                   | University of Southern California                             |
| 8           | 0.4                     | West Virginia University                                      |
| 9           | 0.386                   | Duke University                                               |
| 10          | 0.384                   | University at Buffalo/The State University of New York        |
| 11          | 0.358                   | The University of Iowa                                        |
| 12          | 0.348                   | Emory University                                              |
| 13          | 0.305                   | University of Minnesota                                       |
| 14          | 0.304                   | Howard University                                             |
| 15          | 0.29                    | Virginia Commonwealth University                              |
| 16          | 0.285                   | University of Colorado                                        |
| 17          | 0.282                   | The University of Texas Health Science Center at San Antonio  |
| 18          | 0.275                   | Mercer University Health Services                             |
| 19          | 0.272                   | Yale University                                               |
| 20          | 0.26                    | University of Louisville                                      |
| 21          | 0.259                   | State University of New York Downstate Medical Center         |
| 22          | 0.2588                  | University of California, Davis                               |
| 23          | 0.257                   | Medical College of Wisconsin                                  |
| 24          | 0.256                   | University of Wisconsin - Madison                             |
| 25          | 0.255                   | University of North Texas Health Service Center at Fort Worth |
| 26          | 0.248                   | The Texas A&M University System Health Science Center         |
| 27          | 0.2379                  | East Carolina University                                      |
| 28          | 0.2375                  | Vanderbilt University                                         |
| 29          | 0.233                   | Rutgers Biomedical and Health Sciences                        |
| 30          | 0.23                    | Oklahoma State University Center for Health Sciences          |
| 31          | 0.223                   | University of Nebraska Medical Center                         |
| 32          | 0.218                   | Rosalind Franklin University of Medicine and Science          |
| 33          | 0.197                   | University of Central Florida                                 |
| 34          | 0.188                   | Baylor College of Medicine                                    |
| 35          | 0.183                   | Meharry Medical College                                       |
| 36          | 0.175                   | East Tennessee State University                               |
| 37          | 0.174                   | University of California System                               |
| 38          | 0.166                   | Western University of Health Sciences                         |
| 39          | 0.159                   | New York Institute of Technology                              |
| 40          | 0.153                   | The University of Iowa                                        |

**Supplementary Table 3.** Network-wide metrics of each AMC website.

| <b>Column ID</b> | <b>Column Name</b>             | <b>Description</b>                                                                                                                                |
|------------------|--------------------------------|---------------------------------------------------------------------------------------------------------------------------------------------------|
| A                | Name                           | Academic medical center name                                                                                                                      |
| B                | Nodes                          | Number of nodes in the network                                                                                                                    |
| C                | Edges                          | Number of undirected edges in the network                                                                                                         |
| D                | Average Degree                 | Mean of the degree for all nodes in the network                                                                                                   |
| E                | Number of Connected Components | Number of nodes in the network that are connected                                                                                                 |
| F                | Average Shortest Path Length   | Mean of the shortest path length between all possible pairs of nodes in the network                                                               |
| G                | Density                        | Ratio of edges observed in the network and the maximum number of possible edges in the network                                                    |
| H                | Diameter                       | The longest path length out of the shortest path lengths between all possible pairs of nodes in the network                                       |
| I                | Transitivity                   | Ratio of the number of triangles observed in the network and the number of connected triples of nodes in the network                              |
| J                | Average Clustering             | Mean of the clustering coefficient for each node in the network                                                                                   |
| K                | Assortativity                  | Metric based on the similarity of connections in the graph relative to the node degree.                                                           |
| L                | Modularity                     | Metric based on the network structure that measures the density of connections between nodes within the same module and between different modules |
| M                | Number of Communities          | Number of different sets of unique nodes grouped together using semi-synchronous label propagation algorithms                                     |
